# Supplementary material for: A BIA-Based Quantitative Framework for Built Physical Asset Criticality Analysis under Sustainability and Resilience
Source: MDPI journal article supplement (doi:10.3390/buildings13010264), 2023-01-16
Supplement: s1 [file s1]

Archive with 1 entries (1 files):
- buildings-2145174-supplementary.pdf
